# Supplementary material for: A high-pressure phase of Na2CuF4 with eight-coordinated Cu2+ – a low-pressure analogue of Mg2SiO4
Source: Royal Society of Chemistry journal article supplement (doi:10.1039/d3qi02671j), 2024-01-01
Supplement: d3qi02671j1.pdf [file d3qi02671j1.pdf]

## Electronic Supplementary Information

### High-pressure phase of $\text{Na}_2\text{CuF}_4$ with eight-coordinated $\text{Cu}^{2+}$

#### – a low-pressure analogue of $\text{Mg}_2\text{SiO}_4$

Deepak Upadhyay,<sup>1</sup> Sharad Babu Pillai,<sup>1</sup> Jakub Drapała,<sup>2</sup> Zoran Mazej,<sup>3</sup> Dominik Kurzydłowski<sup>1\*</sup>

<sup>1</sup> Faculty of Mathematics and Natural Sciences, Cardinal Stefan Wyszyński University in Warsaw, 01-038 Warsaw, Poland

<sup>2</sup> Faculty of Chemistry, Warsaw University of Technology, 00-664 Warsaw, Poland

<sup>3</sup> Department of Inorganic Chemistry and Technology, Jožef Stefan Institute, SI-1000 Ljubljana, Slovenia

d.kurzydowski@uksw.edu.pl

#### Synthesis of $\text{Na}_2\text{CuF}_4$

All manipulations were performed under anhydrous conditions. Non-volatile substances were handled in a MBraun glove box in an argon atmosphere in which the amount of water did not exceed 0.5 ppm. Volatile compounds, such as anhydrous HF and  $\text{F}_2$ , were handled on a vacuum line constructed from nickel and PTFE (polytetrafluoroethylene). The vessel, used for the synthesis of  $\text{CuF}_2$  at room temperature consisted of a tube (i.d. 16 mm, o.d. 19 mm) made of tetrafluoroethylene-hexafluoropropylene block-copolymer (FEP; Polytetra GmbH, Germany). It was heat-sealed at one end and fitted with a PTFE valve at the other end. Commercially available NaF (Merck, 99 %) was treated with elemental fluorine at 250 °C before use.  $\text{CuF}_2$  was prepared by fluorination of  $\text{CuCl}_2$  (Aldrich, 99.9995 %) with elemental fluorine in anhydrous liquid hydrogen fluoride at room temperature. The resulting  $\text{CuF}_2$  was additionally treated with 3 bar elemental fluorine at 260 °C for 24 hours in a nickel autoclave.

The synthesis of  $\text{Na}_2\text{CuF}_4$  is based on the solid-state reaction between 181 mg (4.32 mmol) NaF and 219 mg (2.16 mmol)  $\text{CuF}_2$ . The starting mixture was ground on an agate mortar, placed in a Pt-boat covered with a Pt-lid and sealed in a nickel reactor (130 ml) under a dry argon atmosphere. The reactor was evacuated. Under these conditions, the mixture of  $2\text{NaF} / \text{CuF}_2$  was heated to about 520 °C. After 23 hours of heating, the reactor was cooled to room temperature and the mixture was ground again. The synthesis procedure was repeated. After a further annealing at 525 °C for 47 hours, the colorless sample was obtained. Its purity was verified by x-ray powder diffraction (see Fig. S1) showing no impurities present.

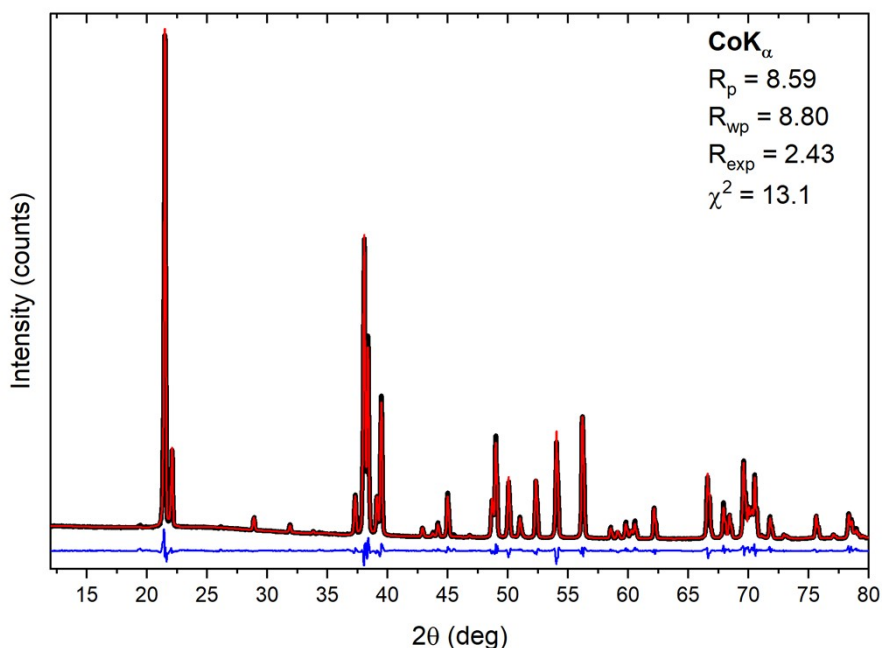

**FIG. S1** Powder x-ray diffraction patterns (black lines) of  $\text{Na}_2\text{CuF}_4$  synthesized as described in the Methods section of the manuscript. Red lines depict a Rietveld refinement model which included the ambient-pressure  $P2_1/c$  ( $\alpha$ ) structure of  $\text{Na}_2\text{CuF}_4$ ; [1] blue lines depict difference between model and experiment. The pattern was obtained from a powder enclosed in a 0.5 mm quartz capillary (Hingelberg, glass no 50) using Panalytical diffractometer X'Pert Pro with  $\text{CoK}\alpha$  radiation ( $0.026^\circ$   $2\theta$  step / 1316 seconds per step). Rietveld refinement was conducted with FullProf programme.

## Raman measurements

Raman spectra were collected at room temperature using an Alpha300M+ confocal microscope (Witec GmbH). A 532 nm laser line was delivered to the microscope via a single-mode optical fiber, with the laser power at the sample not exceeding 25 mW. The Raman signal was collected through a  $50\times$  long working distance objective (NA = 0.40) and transmitted through a photonic-crystal fiber to a lens-based spectrometer (Witec UHTS 300,  $f/4$  aperture, focal length 300 mm) equipped with a back-illuminated Andor iDUS 401 detector, which was thermoelectrically cooled to  $-60^\circ\text{C}$ . The spectra were acquired using a  $1800\text{ mm}^{-1}$  grating, resulting in a spectral resolution of  $1.2\text{ cm}^{-1}$ . The typical acquisition times ranged from 5 to 20 seconds with 15 to 30 accumulations. Additional area scans ( $120\text{ }\mu\text{m} \times 120\text{ }\mu\text{m}$  in  $2\text{ }\mu\text{m}$  steps) were performed at selected pressures using a  $900\text{ mm}^{-1}$  grating (spectral resolution of  $5\text{ cm}^{-1}$ ) in order to validate sample homogeneity and pressure gradients within the DAC. The collected spectra were post-processed using the Project FIVE software (Witec GmbH) by performing background subtraction, cosmic-ray removal, and smoothing. The positions of Raman bands were determined using the Fityk 1.3.1 software by fitting the observed bands with pseudo-Voigt profiles.

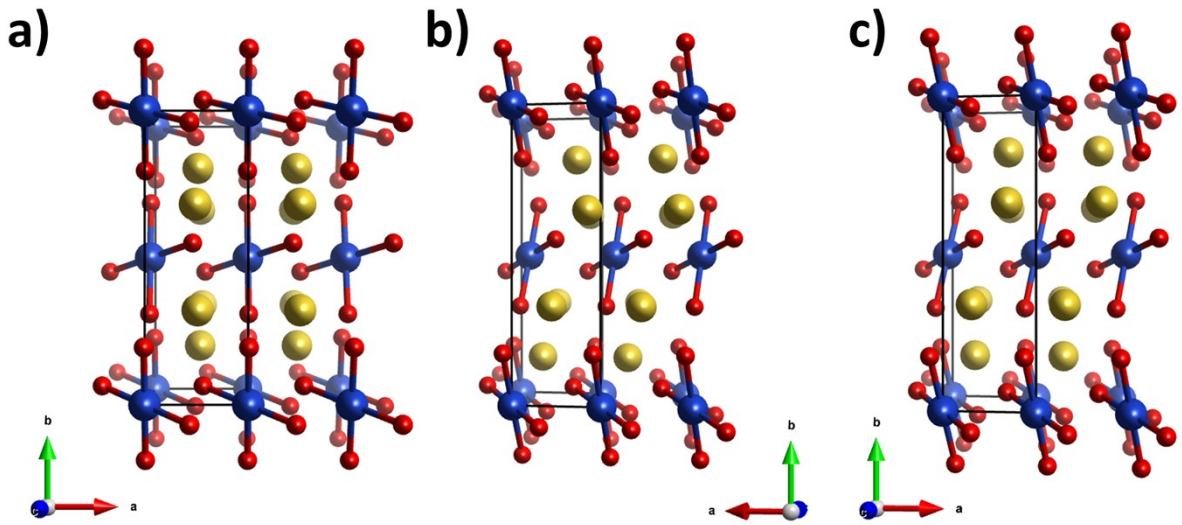

**FIG. S2** Comparison of the structure of: (a)  $P2_1/c$  ( $\alpha$ ), (b)  $P2_1$ , and (c)  $P2_1/c$  ( $\beta$ ). Yellow/blue/red balls denote Na/Cu/F atoms.

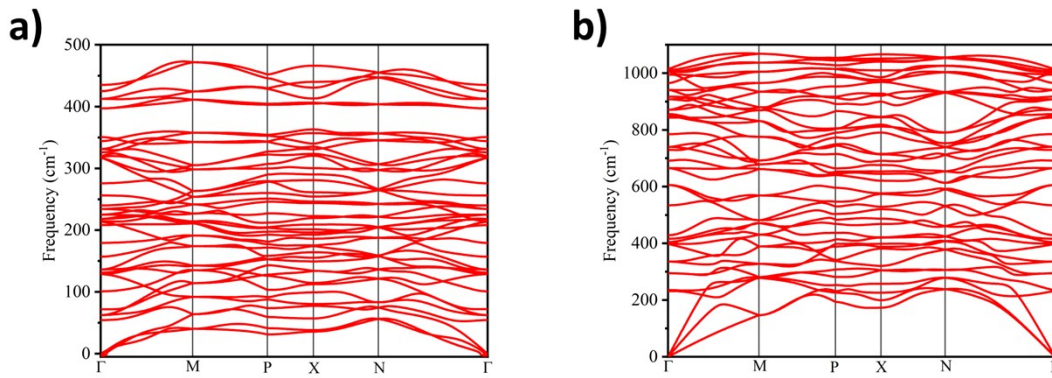

**FIG. S3** Phonon dispersion curves calculated for the  $I42d$  structure of  $\text{Na}_2\text{CuF}_4$  at: (a) 1 atm and (b) 300 GPa.

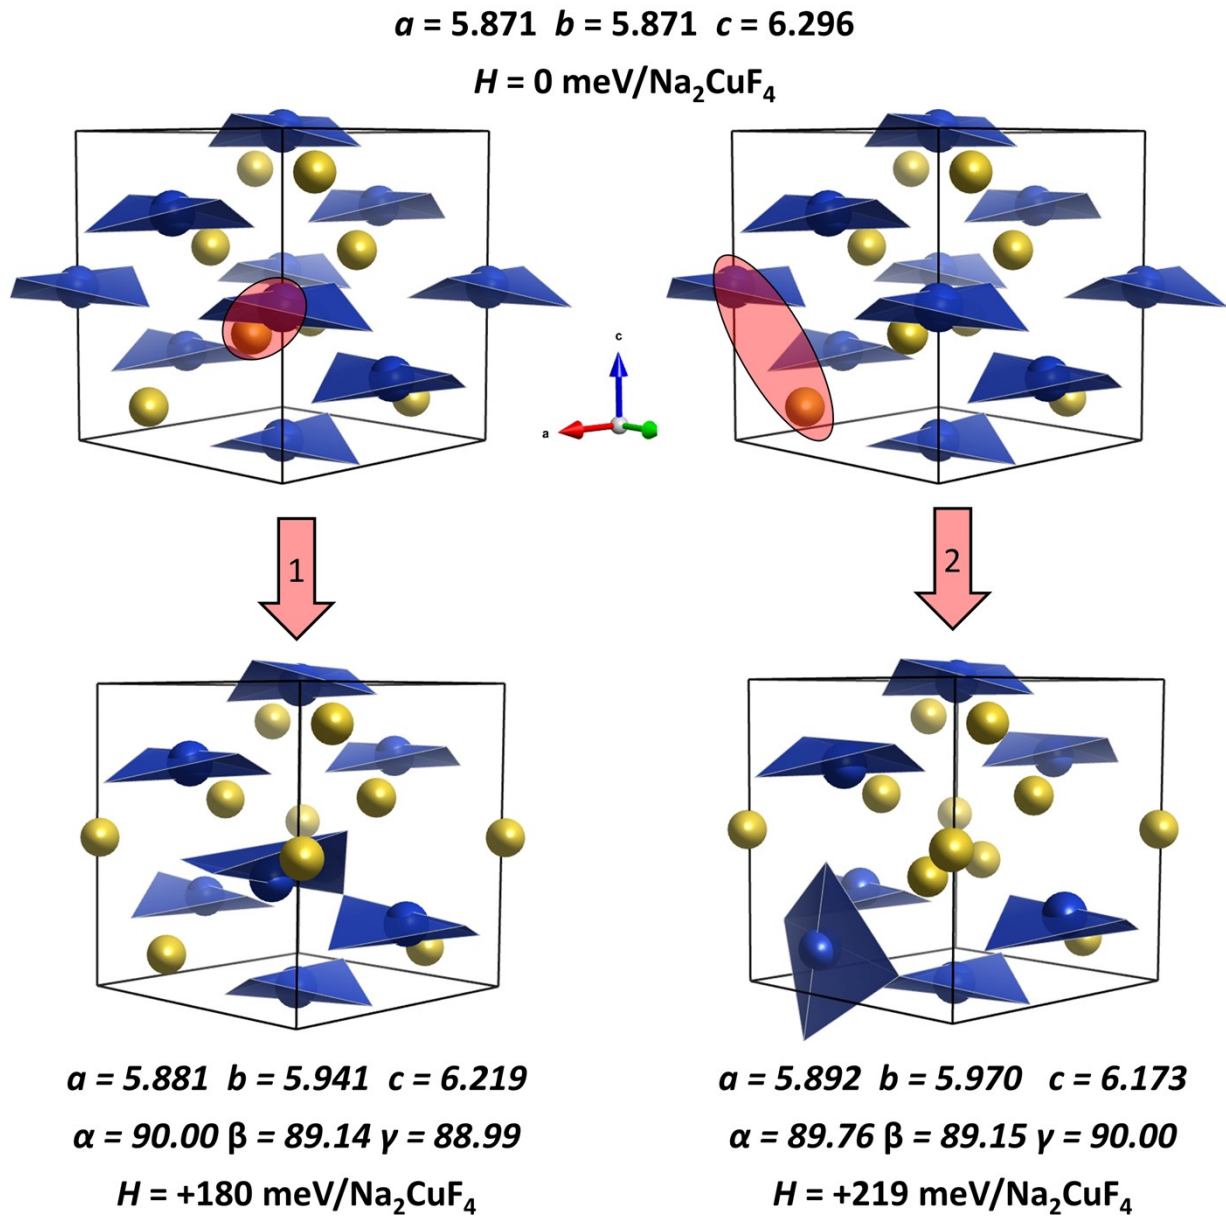

**FIG. S4** Schematic depiction of the two irreducible  $\text{Na}_2\text{CuF}_4$  structures of  $PI$  symmetry obtained through a single Na/Cu exchange in the conventional cell of  $I42d$ . The lattice parameters (in Å) and cell angles (in °) are given for the structures after geometry optimization at 50 GPa, as well as their enthalpies relative to the parent tetragonal structure. Fluorine atoms are omitted for clarity.

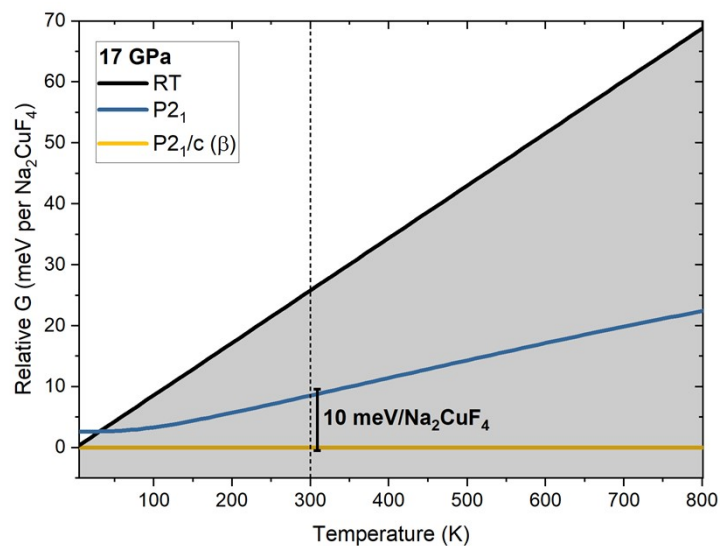

**FIG. S5** Gibbs free energy of  $P2_1$  relative to that of  $P2_1/c (\beta)$  calculated at 17 GPa compared to thermal energy ( $R \cdot T$ ).

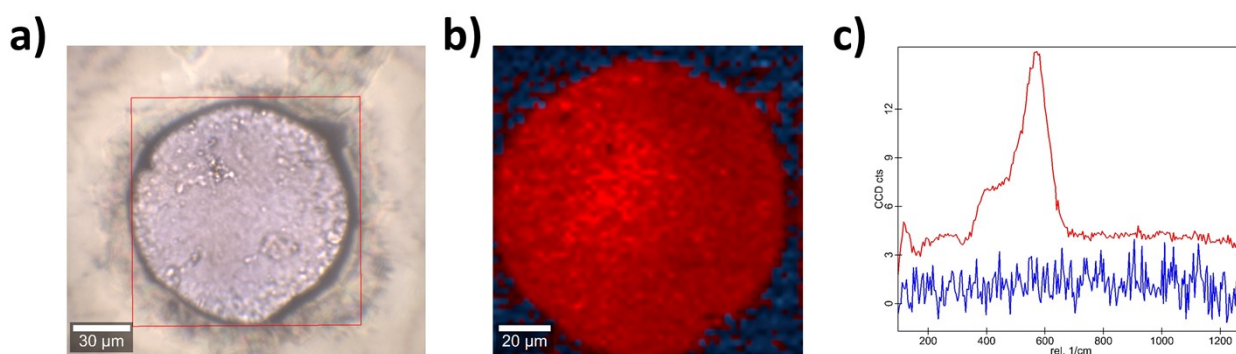

**FIG. S6** (a) White-light photograph of a  $\text{Na}_2\text{CuF}_4$  sample enclosed in a DAC at 42 GPa – red lines denote the boundaries of the Raman areas scan conducted at this pressure; (b) colour map marking areas for which respective spectra, given in (c) with the same colour-coding, are observed.

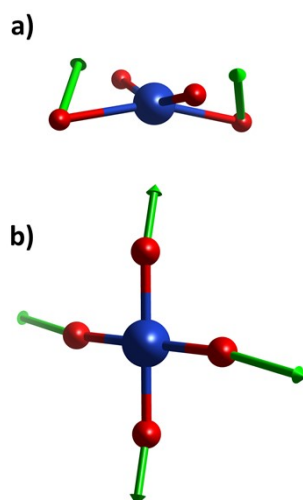

**FIG. S7** Comparison of the movement of atoms in the first coordination sphere of  $\text{Cu}^{2+}$  in the most intense Raman-bands of: (a)  $I42d$  at 40 GPa ( $4A_1$  mode at  $567 \text{ cm}^{-1}$ ) and (b)  $P2_1/c (\beta)$  at 40 GPa ( $9A_g$  mode at  $625 \text{ cm}^{-1}$ ).

**Table S1.** Calculated structural details of Na<sub>2</sub>CuF<sub>4</sub> phases

| Phase                              | Pressure | Lattice parameters                                                                                                                                         | Atomic coordinates                                                                                                                                                                                                                                                                                                                                                                                                                                                                                                           |
|------------------------------------|----------|------------------------------------------------------------------------------------------------------------------------------------------------------------|------------------------------------------------------------------------------------------------------------------------------------------------------------------------------------------------------------------------------------------------------------------------------------------------------------------------------------------------------------------------------------------------------------------------------------------------------------------------------------------------------------------------------|
| <i>P2<sub>1</sub>/c (α)</i>        | 1 atm    | $a = 3.238 \text{ \AA}$<br>$b = 9.279 \text{ \AA}$<br>$c = 5.593 \text{ \AA}$<br>$\beta = 92.15^\circ$                                                     | Cu 2 a 0.00000 0.00000 0.00000<br>Na 4 e 0.51232 0.68184 -0.07953<br>F 4 e 0.56899 -0.04953 0.76931<br>F 4 e 0.00746 0.68879 0.62548                                                                                                                                                                                                                                                                                                                                                                                         |
| <i>P2<sub>1</sub></i>              | 10 GPa   | $a = 2.975 \text{ \AA}$<br>$b = 9.752 \text{ \AA}$<br>$c = 5.139 \text{ \AA}$<br>$\beta = 103.15^\circ$                                                    | Cu 2 a 0.41221 0.49990 0.75322<br>Na 2 a 0.71288 0.35498 0.28450<br>Na 2 a 0.11699 0.67221 0.22975<br>F 2 a 0.26785 0.05474 0.51121<br>F 2 a -0.08816 -0.05599 -0.0139<br>F 2 a 0.33335 0.32512 0.60203<br>F 2 a 0.49802 0.67011 -0.0894                                                                                                                                                                                                                                                                                     |
| <i>P2<sub>1</sub>/c (β)</i>        | 10 GPa   | $a = 2.949 \text{ \AA}$<br>$b = 9.705 \text{ \AA}$<br>$c = 5.152 \text{ \AA}$<br>$\beta = 101.13^\circ$                                                    | Cu 2 a 0.00000 0.00000 0.00000<br>Na 4 e 0.68614 0.15939 0.46918<br>F 4 e 0.31868 0.44949 0.23128<br>F 4 e 0.10264 0.17493 0.14569                                                                                                                                                                                                                                                                                                                                                                                           |
| <i>I42d</i>                        | 50 GPa   | $a = b = 5.871 \text{ \AA}$<br>$c = 6.296 \text{ \AA}$                                                                                                     | Cu 4 a 0.00000 0.00000 0.00000<br>Na 8 d 0.60622 0.25000 0.12500<br>F 16 e 0.56917 0.19685 0.44990                                                                                                                                                                                                                                                                                                                                                                                                                           |
| <i>P1</i><br>(Cu/Na interchange 1) | 50 GPa   | $a = 5.881 \text{ \AA}$<br>$b = 5.941 \text{ \AA}$<br>$c = 6.219 \text{ \AA}$<br>$\alpha = 90.00^\circ$<br>$\beta = 89.14^\circ$<br>$\gamma = 88.99^\circ$ | Cu 1 a 0.23429 0.35869 0.38699<br>Cu 1 a 0.50525 0.00245 0.25641<br>Cu 1 a 0.50227 0.50837 -0.00453<br>Cu 1 a -0.00159 0.50385 0.75193<br>Na 1 a 0.10916 0.75035 0.12084<br>Na 1 a 0.89052 0.24805 0.11663<br>Na 1 a 0.74833 0.89832 0.87078<br>Na 1 a 0.25290 0.10667 0.87502<br>Na 1 a 0.38151 0.75375 0.61505<br>Na 1 a 0.62096 0.24728 0.63191<br>Na 1 a -0.00214 -0.01850 0.49625<br>Na 1 a 0.75523 0.61977 0.37820<br>F 1 a -0.07005 0.31159 0.43203<br>F 1 a 0.08969 0.65758 0.43969<br>F 1 a 0.31151 0.08875 0.55267 |

|                                                          |        |                                                                                                                                                                                                                                                         |                                                                                                                                                                                                                                                                                                                                                                                                                                                                                                                                                                                                                                                                                                                                                                                                                                                                                                                                                                                                                                                                                                  |
|----------------------------------------------------------|--------|---------------------------------------------------------------------------------------------------------------------------------------------------------------------------------------------------------------------------------------------------------|--------------------------------------------------------------------------------------------------------------------------------------------------------------------------------------------------------------------------------------------------------------------------------------------------------------------------------------------------------------------------------------------------------------------------------------------------------------------------------------------------------------------------------------------------------------------------------------------------------------------------------------------------------------------------------------------------------------------------------------------------------------------------------------------------------------------------------------------------------------------------------------------------------------------------------------------------------------------------------------------------------------------------------------------------------------------------------------------------|
|                                                          |        |                                                                                                                                                                                                                                                         | <p>F 1 a 0.67285 -0.07413 0.55172</p> <p>F 1 a 0.54290 0.32276 0.31729</p> <p>F 1 a 0.43858 0.70181 0.28902</p> <p>F 1 a 0.19938 0.06193 0.20062</p> <p>F 1 a 0.80793 -0.06531 0.19776</p> <p>F 1 a 0.42971 0.80648 -0.05961</p> <p>F 1 a 0.56881 0.20303 -0.03619</p> <p>F 1 a 0.80693 0.57008 0.05167</p> <p>F 1 a 0.20122 0.42699 0.07044</p> <p>F 1 a 0.06627 0.80341 0.79343</p> <p>F 1 a -0.06325 0.20234 0.79181</p> <p>F 1 a 0.69439 0.56714 0.70107</p> <p>F 1 a 0.30645 0.43649 0.71108</p>                                                                                                                                                                                                                                                                                                                                                                                                                                                                                                                                                                                            |
| <p><b><i>PI</i></b><br/><b>(Cu/Na interchange 2)</b></p> | 50 GPa | <p><math>a = 5.892 \text{ \AA}</math></p> <p><math>b = 5.970 \text{ \AA}</math></p> <p><math>c = 6.173 \text{ \AA}</math></p> <p><math>\alpha = 89.76^\circ</math></p> <p><math>\beta = 89.15^\circ</math></p> <p><math>\gamma = 90.00^\circ</math></p> | <p>Cu 1 a 0.75054 0.10652 0.87610</p> <p>Cu 1 a -0.00013 0.50426 0.72909</p> <p>Cu 1 a 0.50228 0.50272 0.00653</p> <p>Cu 1 a 0.49340 -0.00705 0.26673</p> <p>Na 1 a 0.00518 -0.00510 0.49266</p> <p>Na 1 a 0.25225 0.89075 0.86807</p> <p>Na 1 a 0.89496 0.74626 0.12587</p> <p>Na 1 a 0.11070 0.25353 0.13513</p> <p>Na 1 a 0.74935 0.38203 0.38082</p> <p>Na 1 a 0.24463 0.61764 0.37490</p> <p>Na 1 a 0.37760 0.25337 0.62079</p> <p>Na 1 a 0.61802 0.75211 0.61975</p> <p>F 1 a 0.32972 -0.07106 0.54675</p> <p>F 1 a 0.69195 0.08447 0.58217</p> <p>F 1 a 0.07405 0.31945 0.45684</p> <p>F 1 a -0.08166 0.67883 0.44504</p> <p>F 1 a 0.30479 0.56998 0.69952</p> <p>F 1 a 0.69341 0.43984 0.70766</p> <p>F 1 a 0.05384 0.18886 0.81505</p> <p>F 1 a -0.06690 0.80712 0.80092</p> <p>F 1 a 0.80443 0.43139 0.05317</p> <p>F 1 a 0.19994 0.56509 0.04887</p> <p>F 1 a 0.57016 0.80853 -0.05335</p> <p>F 1 a 0.44506 0.19082 -0.06169</p> <p>F 1 a 0.79354 0.06863 0.18342</p> <p>F 1 a 0.18876 -0.06772 0.19253</p> <p>F 1 a 0.56487 0.69204 0.29418</p> <p>F 1 a 0.43524 0.29669 0.29247</p> |

**Table S2.** Position of Raman bands (in  $\text{cm}^{-1}$ ) of the high-pressure phases of  $\text{Na}_2\text{CuF}_4$  obtained in a DAC experiment and DFT modelling at various pressures together with the assignment of their symmetry.

| $P2_1/c$ (1 atm) |      |     | $P2_1$ (15 GPa) |      |          | $P2_1/c$ ( $\beta$ ) (25 GPa) |      |     | $I4_2d$ (40 GPa) |      |     |
|------------------|------|-----|-----------------|------|----------|-------------------------------|------|-----|------------------|------|-----|
| Mode             | Exp. | Th. | Mode            | Exp. | Th.      | Mode                          | Exp. | Th. | Mode             | Exp. | Th. |
| $1A_g$           | 97   | 93  | $3A$            | 110  | 118      | $1A_g$                        | 119  | 121 | $1B_1$           | 114  | 109 |
|                  |      |     | $4A$            | 145  | 147      |                               |      |     | $1B_2$           | 135  | 152 |
|                  |      |     | $2B$            | 153  | 152      |                               |      |     | $1B_g$           | 166  | 176 |
| $4A_g$           | 179  | 180 | $5A$            | 188  | 179      | $2B_g$                        | 180  | 205 | 1E               | 185  | 176 |
| $5A_g$           | 197  | 198 | $5B$            | 201  | 194      |                               |      |     |                  |      |     |
| $5B_g$           | 219  | 218 | $7A$            | 228  | 230      |                               |      |     | $2A_2$           | 234  | 262 |
|                  |      |     | $7B$            | 242  | 242      | $4A_g$                        | 265  | 255 | $2B_1$           | 284  | 282 |
|                  |      |     | $9A, 9B$        | 281  | 270, 277 |                               |      |     |                  |      |     |
|                  |      |     | $10B$           | 305  | 300      | $4B_g$                        | 303  | 292 |                  |      |     |
| $7B_g$           | 310  | 319 | $13A$           | 339  | 342      | $5B_g$                        | 323  | 321 |                  |      |     |
| $8A_g$           | 321  | 323 | $15A$           | 370  | 369      | $6A_g$                        | 361  | 351 | $2A_1$           | 388  | 373 |
|                  |      |     | $16A$           | 383  | 388      |                               |      |     |                  |      |     |
| $8B_g$           | 368  | 365 | $15B$           | 400  | 404      | $7A_g$                        | 449  | 445 | $3B_1$           | 416  | 471 |
|                  |      |     | $17A$           | 434  | 432      | $8B_g$                        | 481  | 503 |                  |      |     |
| $9A_g$           | 457  | 447 | $19A$           | 520  | 520      | $8A_g$                        | 516  | 518 |                  |      |     |
| $9B_g$           | 475  | 461 | $18B$           | 536  | 543      | $9A_g$                        | 593  | 572 | $5B_2$           | 538  | 513 |
|                  |      |     | $20A$           | 558  | 563      | $8B_g$                        | 611  | 586 | $4A_1$           | 577  | 567 |

## References

- [1] D. Babel, *Untersuchungen an Ternaren Fluoriden. III) Die Struktur Des  $\text{Na}_2\text{CuF}_4$* , Zeitschrift Fur Anorg. Und Allg. Chemie **336**, 200 (1965).
